# Supplementary material for: Attempting to understand (and control) the relationship between structure and magnetism in an extended family of Mn6 single-molecule magnets
Source: Royal Society of Chemistry journal article supplement (doi:10.1039/b822235e), 2009-01-01
Supplement: b822235e.pdf [file b822235e.pdf]

**Table SII. Crystallographic data for complexes 3-5, 8, 13, 21, 22.**

|                                                  | <b>3</b>                                                                       | <b>4</b>                                                                        | <b>5</b>                                                                       | <b>8</b>                                                                       |
|--------------------------------------------------|--------------------------------------------------------------------------------|---------------------------------------------------------------------------------|--------------------------------------------------------------------------------|--------------------------------------------------------------------------------|
| Formula <sup>a</sup>                             | C <sub>72</sub> H <sub>84</sub> Mn <sub>6</sub> N <sub>6</sub> O <sub>28</sub> | C <sub>72</sub> H <sub>68</sub> Mn <sub>6</sub> N <sub>14</sub> O <sub>20</sub> | C <sub>64</sub> H <sub>80</sub> Mn <sub>6</sub> N <sub>6</sub> O <sub>24</sub> | C <sub>70</sub> H <sub>96</sub> Mn <sub>6</sub> N <sub>6</sub> O <sub>24</sub> |
| <i>M</i> <sub>w</sub>                            | 1811.05                                                                        | 1778.98                                                                         | 1646.93                                                                        | 1735.13                                                                        |
| Crystal System                                   | Triclinic                                                                      | Triclinic                                                                       | Triclinic                                                                      | Triclinic                                                                      |
| Space group                                      | P-1                                                                            | P-1                                                                             | P-1                                                                            | P-1                                                                            |
| <i>a</i> /Å                                      | 11.9177(3)                                                                     | 12.1880(3)                                                                      | 12.7404(3)                                                                     | 13.521(2)                                                                      |
| <i>b</i> /Å                                      | 12.7405(3)                                                                     | 12.2015(3)                                                                      | 15.4280(4)                                                                     | 13.6880(19)                                                                    |
| <i>c</i> /Å                                      | 13.5095(3)                                                                     | 13.3261(3)                                                                      | 19.0456(5)                                                                     | 13.814(2)                                                                      |
| <i>α</i> <sup>o</sup>                            | 80.875(1)                                                                      | 101.143(1)                                                                      | 90.075(2)                                                                      | 112.975(9)                                                                     |
| <i>β</i> <sup>o</sup>                            | 77.238(1)                                                                      | 96.929(1)                                                                       | 103.2920(10)                                                                   | 95.825(9)                                                                      |
| <i>γ</i> <sup>o</sup>                            | 80.941(1)                                                                      | 106.861(1)                                                                      | 98.8750(10)                                                                    | 118.889(7)                                                                     |
| <i>V</i> /Å <sup>3</sup>                         | 1959.23(8)                                                                     | 1827.56(8)                                                                      | 3597.04(16)                                                                    | 1923.0(6)                                                                      |
| <i>Z</i>                                         | 1                                                                              | 1                                                                               | 2                                                                              | 1                                                                              |
| <i>T</i> /K                                      | 150                                                                            | 150                                                                             | 150                                                                            | 150                                                                            |
| <i>λ</i> <sup>b</sup> /Å                         | 0.71073                                                                        | 0.71073                                                                         | 0.71073                                                                        | 0.71073                                                                        |
| <i>D</i> <sub>c</sub> /g cm <sup>-3</sup>        | 1.535                                                                          | 1.620                                                                           | 1.520                                                                          | 1.498                                                                          |
| <i>μ</i> (Mo-Kα)/mm <sup>-1</sup>                | 1.022                                                                          | 1.090                                                                           | 1.101                                                                          | 1.034                                                                          |
| Meas./indep.( <i>R</i> <sub>int</sub> )<br>refl. | 33921 / 10895 (0.042)                                                          | 27345 / 7457 (0.041)                                                            | 48617 / 20054 (0.042)                                                          | 17799 / 10695 (0.0864)                                                         |
| Obs. refl. [ <i>I</i> >2σ( <i>I</i> )]           | 8549                                                                           | 5865                                                                            | 15709                                                                          | 9800                                                                           |
| <i>wR</i> 2 <sup>c,d</sup>                       | 0.1068                                                                         | 0.0883                                                                          | 0.1305                                                                         | 0.1886                                                                         |
| <i>R</i> 1 <sup>d,e</sup>                        | 0.0437                                                                         | 0.0358                                                                          | 0.0541                                                                         | 0.0757                                                                         |
| Goodness of fit on<br><i>F</i> <sup>2</sup>      | 0.9321                                                                         | 0.8895                                                                          | 1.0171                                                                         | 1.0423                                                                         |
| <i>Δρ</i> <sub>max,min</sub> /eÅ <sup>-3</sup>   | 0.89 / -0.69                                                                   | 0.51 / -0.50                                                                    | 0.75 / -0.73                                                                   | 1.27 / -0.96                                                                   |

|                                                   | <b>13</b>                                                                      | <b>21</b>                                                                      | <b>22</b>                                                                                          |
|---------------------------------------------------|--------------------------------------------------------------------------------|--------------------------------------------------------------------------------|----------------------------------------------------------------------------------------------------|
| Formula <sup>a</sup>                              | C <sub>65</sub> H <sub>92</sub> Mn <sub>6</sub> N <sub>6</sub> O <sub>27</sub> | C <sub>80</sub> H <sub>97</sub> Mn <sub>6</sub> N <sub>6</sub> O <sub>26</sub> | C <sub>68</sub> H <sub>74.5</sub> Cl <sub>4</sub> Mn <sub>6</sub> N <sub>6</sub> O <sub>24.5</sub> |
| <i>M</i> <sub>w</sub>                             | 1719.04                                                                        | 1888.24                                                                        | 1839.24                                                                                            |
| Crystal System                                    | Triclinic                                                                      | Triclinic                                                                      | Triclinic                                                                                          |
| Space group                                       | P-1                                                                            | P-1                                                                            | P-1                                                                                                |
| <i>a</i> /Å                                       | 12.2582(4)                                                                     | 12.1777(3)                                                                     | 11.9218(2)                                                                                         |
| <i>b</i> /Å                                       | 12.3804(4)                                                                     | 12.3384(2)                                                                     | 12.0379(2)                                                                                         |
| <i>c</i> /Å                                       | 14.8895(5)                                                                     | 14.4043(3)                                                                     | 13.6675(3)                                                                                         |
| <i>α</i> <sup>o</sup>                             | 91.749(2)                                                                      | 84.4970(10)                                                                    | 85.793(1)                                                                                          |
| <i>β</i> <sup>o</sup>                             | 107.077(2)                                                                     | 89.042(2)                                                                      | 85.319(1)                                                                                          |
| <i>γ</i> <sup>o</sup>                             | 115.261(2)                                                                     | 75.2140(10)                                                                    | 75.513(1)                                                                                          |
| <i>V</i> /Å <sup>3</sup>                          | 1921.47(12)                                                                    | 2082.91(8)                                                                     | 1889.92(6)                                                                                         |
| <i>Z</i>                                          | 1                                                                              | 1                                                                              | 1                                                                                                  |
| <i>T</i> /K                                       | 150                                                                            | 150                                                                            | 150                                                                                                |
| <i>λ</i> <sup>b</sup> /Å                          | 0.71073                                                                        | 0.71073                                                                        | 0.71073                                                                                            |
| <i>D</i> <sub>c</sub> /g cm <sup>-3</sup>         | 1.490                                                                          | 1.505                                                                          | 1.616                                                                                              |
| <i>μ</i> (Mo-Kα)/mm <sup>-1</sup>                 | 1.037                                                                          | 0.963                                                                          | 1.194                                                                                              |
| Meas./indep. ( <i>R</i> <sub>int</sub> )<br>refl. | 41182 / 10653 (0.058)                                                          | 49999 / 8507 (0.054)                                                           | 22561 / 7715 (0.035)                                                                               |
| Obs. refl. [ <i>I</i> > 2σ( <i>I</i> )]           | 8300                                                                           | 5460                                                                           | 6111                                                                                               |
| <i>wR</i> 2 <sup>c,d</sup>                        | 0.0489                                                                         | 0.1085                                                                         | 0.0780                                                                                             |
| <i>R</i> 1 <sup>d,e</sup>                         | 0.1220                                                                         | 0.0345                                                                         | 0.0330                                                                                             |
| Goodness of fit on<br><i>F</i> <sup>2</sup>       | 1.0096                                                                         | 0.8922                                                                         | 0.8767                                                                                             |
| Δρ <sub>max,min</sub> /eÅ <sup>-3</sup>           | 1.05 / -0.76                                                                   | 0.81 / -0.62                                                                   | 0.68 / -0.50                                                                                       |

<sup>a</sup> Including solvate molecules. <sup>b</sup> Mo-Kα radiation, graphite monochromator. <sup>c</sup>  $wR2 = [\sum w(IF_o^2 - IF_c^2)^2 / \sum wIF_o^2]^2$ .  
<sup>d</sup> For observed data. <sup>e</sup>  $R1 = \sum IF_o - IF_c / \sum IF_o$ . SQUEEZE (P. van der Sluis and A. L. Spek, *Acta Cryst.* 1990, **A46**, 194) was employed for 4 and 13 - see CIF files for full details.

**Table SI2** Individual bond lengths making up each Mn-N-O-Mn bridge in complexes **1-24**

| Complex | Mn1-N-O-Mn2 (t.a)             | Mn1-N-O-Mn3 (t.a)             | Mn2-N-O-Mn3 (t.a)             |
|---------|-------------------------------|-------------------------------|-------------------------------|
| (1)     | 2.002 / 1.376 / 1.918 (25.57) | 1.997 / 1.388 / 1.948 (18.01) | 2.006 / 1.375 / 1.898 (10.42) |
| (2)     | 2.013 / 1.371 / 1.906 (25.50) | 1.915 / 1.369 / 2.004 (29.74) | 1.998 / 1.397 / 1.955 (42.44) |
| (3)     | 1.993 / 1.378 / 1.929 (18.74) | 1.932 / 1.390 / 2.011 (18.91) | 2.005 / 1.374 / 1.910 (11.99) |
| (4)     | 1.960 / 1.387 / 2.009 (28.18) | 1.898 / 1.372 / 2.005 (8.38)  | 1.996 / 1.373 / 1.905 (16.18) |
| (5)†    | 2.004 / 1.379 / 1.895 (9.66)  | 1.918 / 1.373 / 2.000 (15.60) | 2.014 / 1.380 / 1.948 (29.83) |
|         | 1.993 / 1.382 / 1.910 (13.53) | 1.918 / 1.376 / 1.997 (37.33) | 2.017 / 1.383 / 1.972 (23.80) |
| (6)     | 1.938 / 1.362 / 2.008 (27.40) | 2.011 / 1.382 / 1.904 (36.35) | 1.909 / 1.398 / 1.988 (31.10) |
| (7)     | 2.018 / 1.373 / 1.922 (27.83) | 1.944 / 1.391 / 1.994 (41.46) | 2.017 / 1.374 / 1.918 (40.07) |
| (8)     | 2.015 / 1.368 / 1.918 (26.93) | 1.952 / 1.387 / 1.986 (40.70) | 2.003 / 1.375 / 1.904 (34.53) |
| (9)     | 1.909 / 1.370 / 2.019 (36.92) | 1.990 / 1.380 / 1.947 (42.12) | 1.916 / 1.376 / 2.029 (23.27) |
|         | 2.011 / 1.376 / 1.911 (32.33) | 1.947 / 1.392 / 1.989 (42.24) | 2.014 / 1.372 / 1.904 (16.76) |
| (10)    | 1.998 / 1.352 / 1.962 (47.56) | 1.894 / 1.368 / 2.002 (23.75) | 2.010 / 1.385 / 1.908 (31.76) |
| (11)    | 2.000 / 1.370 / 1.931 (30.36) | 1.960 / 1.398 / 1.985 (43.71) | 2.021 / 1.374 / 1.909 (38.33) |
| (12)    | 1.871 / 1.388 / 2.022 (30.43) | 1.957 / 1.434 / 1.954 (31.91) | 2.014 / 1.338 / 2.049 (42.94) |
| (13)    | 2.007 / 1.371 / 1.924 (29.68) | 1.965 / 1.392 / 1.993 (44.47) | 2.016 / 1.378 / 1.910 (38.51) |
| (14)    | 1.997 / 1.375 / 1.925 (31.26) | 1.957 / 1.391 / 1.999 (39.92) | 2.006 / 1.376 / 1.924 (38.20) |
| (15)    | 2.004 / 1.376 / 1.918 (39.10) | 1.915 / 1.366 / 2.003 (43.04) | 2.001 / 1.391 / 1.951 (34.86) |
| (16)    | 1.955 / 1.396 / 1.991 (42.61) | 2.007 / 1.396 / 1.931 (34.07) | 1.914 / 1.379 / 2.017 (36.73) |
| (17)    | 1.942 / 1.395 / 1.984 (47.16) | 2.000 / 1.372 / 1.932 (30.37) | 1.916 / 1.371 / 2.027 (38.19) |
| (18)    | 1.996 / 1.395 / 1.958 (41.09) | 1.932 / 1.381 / 1.990 (40.50) | 2.011 / 1.369 / 1.911 (33.28) |
| (19)    | 1.941 / 1.390 / 1.996 (42.32) | 2.015 / 1.370 / 1.928 (25.60) | 1.918 / 1.367 / 2.010 (39.28) |
| (20)    | 1.943 / 1.394 / 1.989 (38.85) | 1.993 / 1.371 / 1.911 (32.06) | 1.916 / 1.379 / 1.998 (38.67) |
| (21)    | 1.981 / 1.396 / 1.966 (43.61) | 2.000 / 1.374 / 1.932 (33.72) | 2.015 / 1.374 / 1.899 (29.53) |
| (22)    | 1.969 / 1.395 / 1.991 (43.48) | 1.990 / 1.370 / 1.922 (31.03) | 1.897 / 1.370 / 2.007 (27.70) |
| (23)    | 2.020 / 1.373 / 1.907 (33.40) | 1.927 / 1.369 / 2.001 (33.00) | 1.991 / 1.393 / 1.957 (43.89) |
| (24)    | 2.001 / 1.372 / 1.926 (33.01) | 1.943 / 1.399 / 1.979 (37.16) | 2.000 / 1.379 / 1.892 (31.28) |
